# Supplementary material for: Increased CD271 expression by the NF-kB pathway promotes melanoma cell survival and drives acquired resistance to BRAF inhibitor vemurafenib
Source: PubMed Central journal article supplement (PMC4860830; doi:10.1038/celldisc.2015.30), 2015-10-27

A

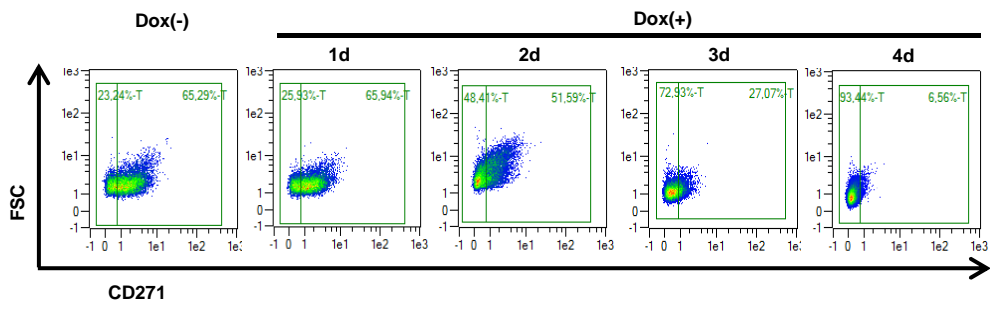

B

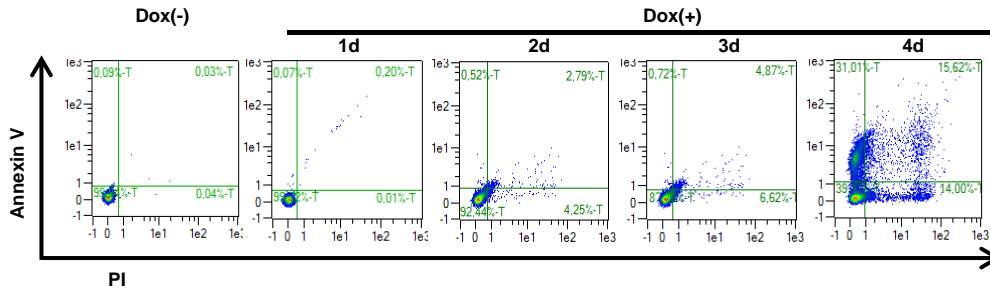

C

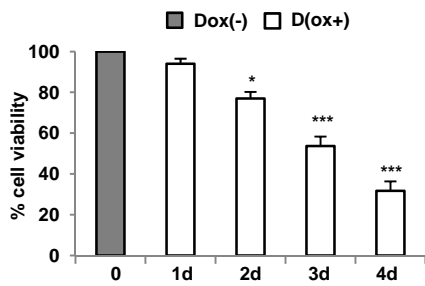

D

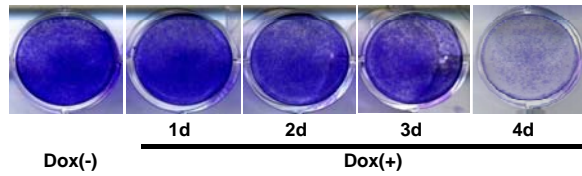

E

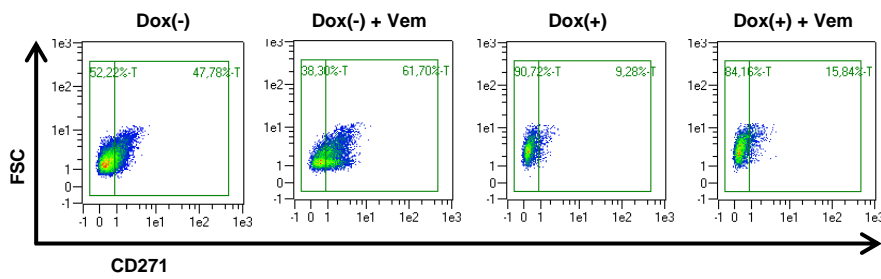

F

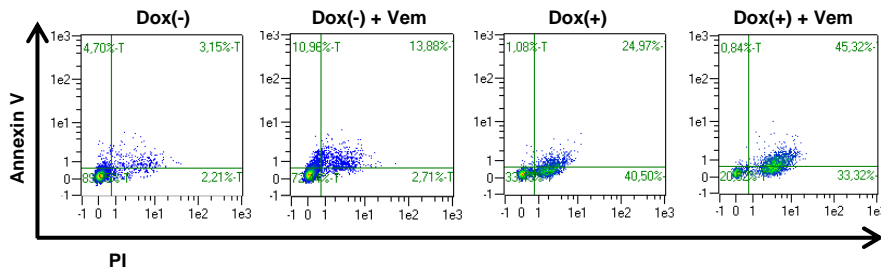

Supplement: celldisc201530-s3.pdf [file celldisc201530-s3.pdf]
